# Supplementary material for: P vacancies-enriched 3D hierarchical reduced cobalt phosphide as a precursor template for defect engineering for efficient water oxidation
Source: Royal Society of Chemistry journal article supplement (doi:10.1039/c8ta03784a), 2018-01-01
Supplement: c8ta03784a1.pdf [file c8ta03784a1.pdf]

## Supplementary Information

### **P vacancies enriched 3D hierarchical reduced cobalt phosphide as a precursor template of defects engineering for efficient water oxidation**

Xichen Zhou,<sup>a</sup> Hong Gao,<sup>a</sup> Yifan Wang,<sup>a</sup> Zhen Liu,<sup>a</sup> Junqi Lin,<sup>a</sup> and Yong Ding<sup>\*ab</sup>

*<sup>a</sup>State Key Laboratory of Applied Organic Chemistry, Key Laboratory of Nonferrous Metal Chemistry and Resources Utilization of Gansu Province and College of Chemistry and Chemical Engineering, Lanzhou University, Lanzhou 730000, China.*

*<sup>b</sup>State Key Laboratory for Oxo Synthesis and Selective Oxidation, Lanzhou Institute of Chemical Physics, Chinese Academy of Sciences, Lanzhou 730000, China.*

**\*Corresponding Authors:** dingyong1@lzu.edu.cn

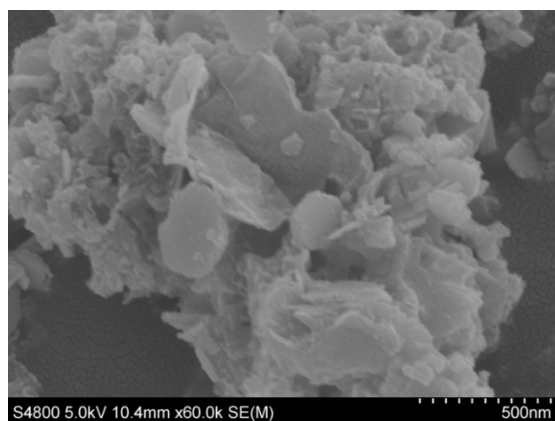

**Fig. S1** The SEM image of R-CoP<sub>x</sub>/rGO(O).

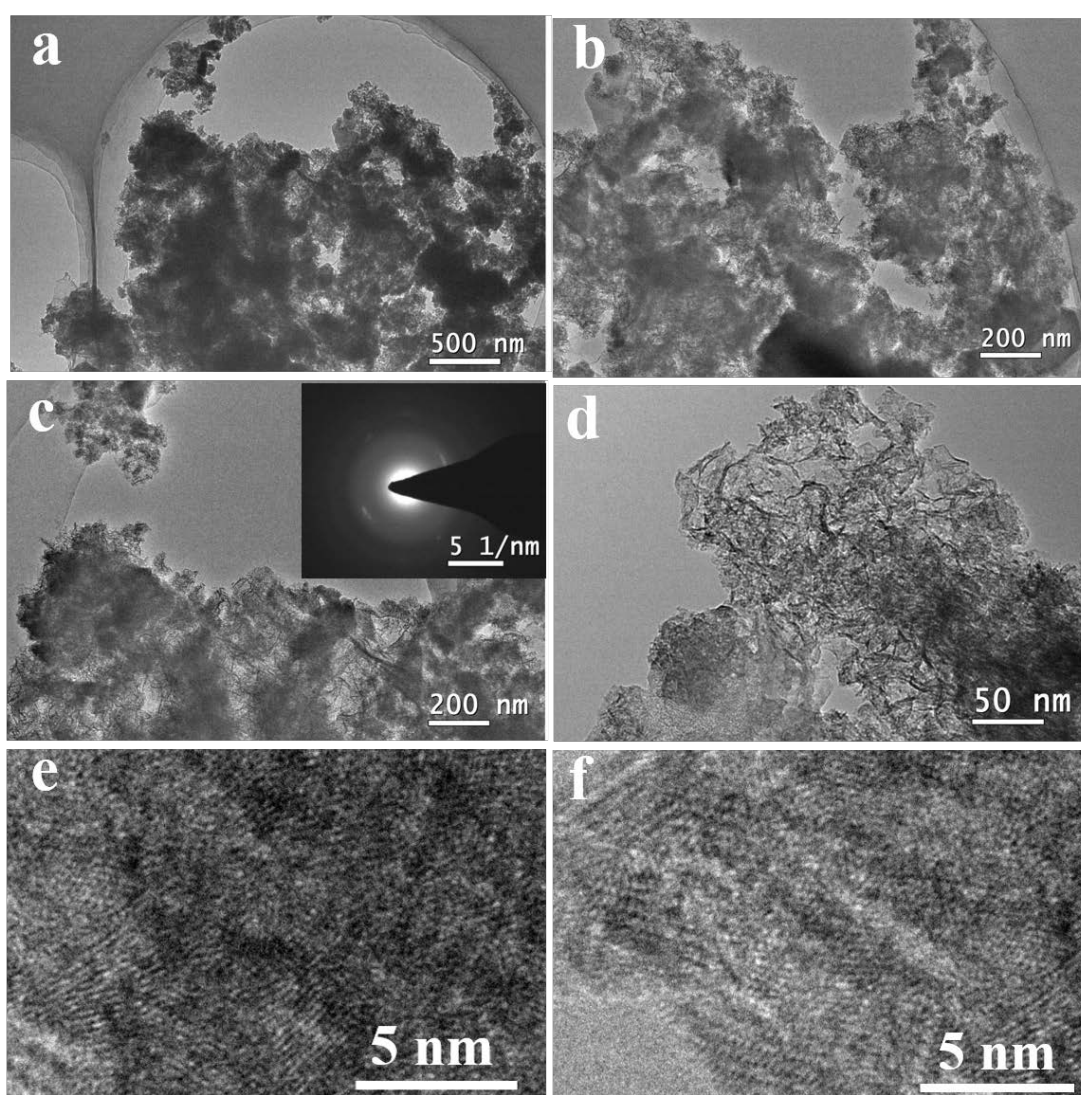

**Fig. S2** The TEM, HRTEM and SAED images of R-CoP<sub>x</sub>/rGO(O).

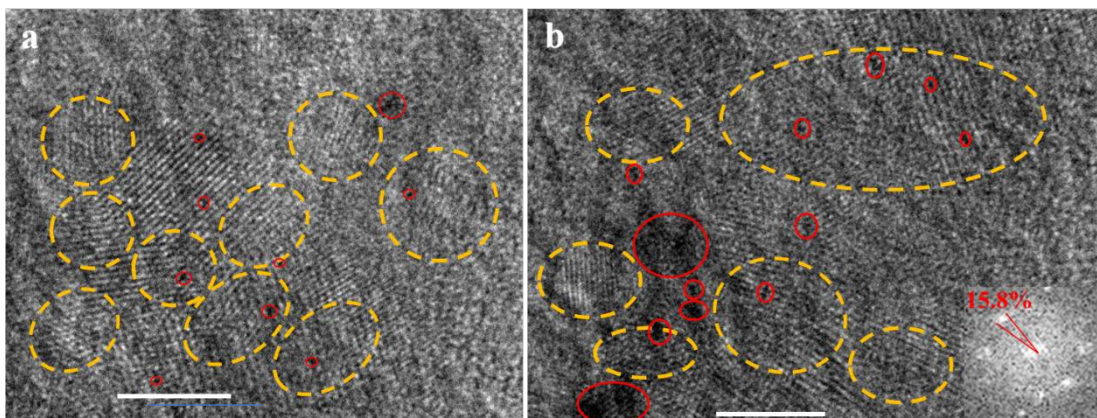

**Fig. S3** (a) and (b) HRTEM images of R-CoP<sub>x</sub>/rGO(O). Some lattice distortion regions of surface CoOOH are circled by closed yellow dash lines. Some defects of surface CoOOH are circled by closed red lines. The inset in (b) is the corresponding fast Fourier transform (FFT) image. The white scale bar represents the length of 5 nm.

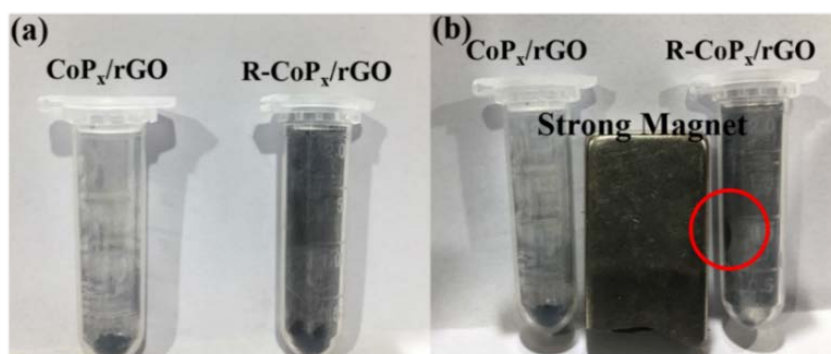

**Fig. S4** (a) The photo images of CoP<sub>x</sub>/rGO and R-CoP<sub>x</sub>/rGO. (b) The photo images of CoP<sub>x</sub>/rGO and R-CoP<sub>x</sub>/rGO in the magnetic field.

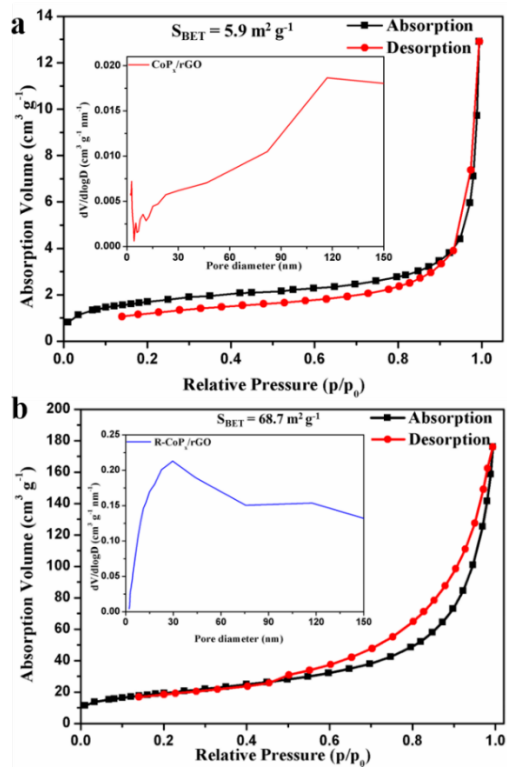

**Fig. S5** N<sub>2</sub> adsorption/desorption isotherm curves for (a) CoP<sub>x</sub>/rGO, and (b) R-CoP<sub>x</sub>/rGO. Insets, the pore-size distributions of materials.

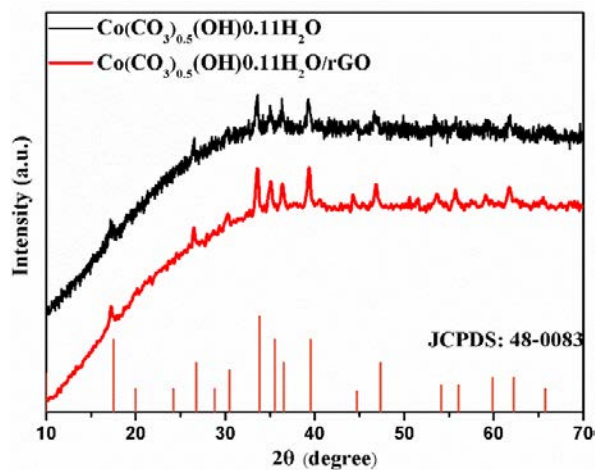

**Fig. S6** PXRD patterns of Co(CO<sub>3</sub>)<sub>0.5</sub>(OH)0.11H<sub>2</sub>O and Co(CO<sub>3</sub>)<sub>0.5</sub>(OH)0.11H<sub>2</sub>O/rGO. The vertical lines are the standard diffraction peaks of Co(CO<sub>3</sub>)<sub>0.5</sub>(OH)0.11H<sub>2</sub>O (JCPDS: 480083).

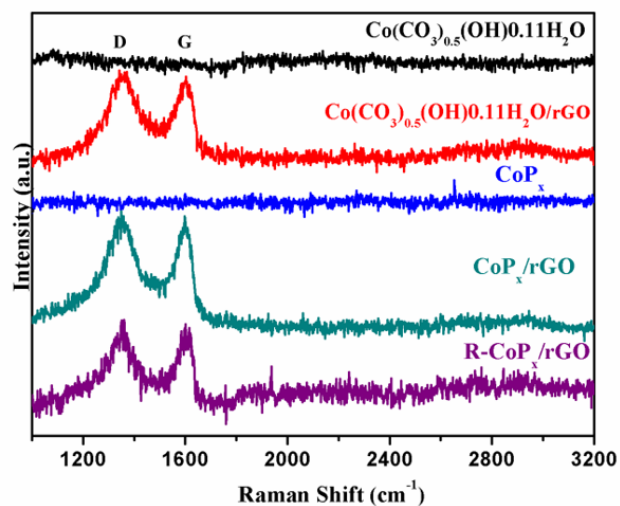

**Fig. S7** Raman spectra of  $\text{Co}(\text{CO}_3)_{0.5}(\text{OH})_{0.11}\text{H}_2\text{O}$ ,  $\text{Co}(\text{CO}_3)_{0.5}(\text{OH})_{0.11}\text{H}_2\text{O}/\text{rGO}$ ,  $\text{CoP}_x$ ,  $\text{CoP}_x/\text{rGO}$  and  $\text{R-CoP}_x/\text{rGO}$  samples.

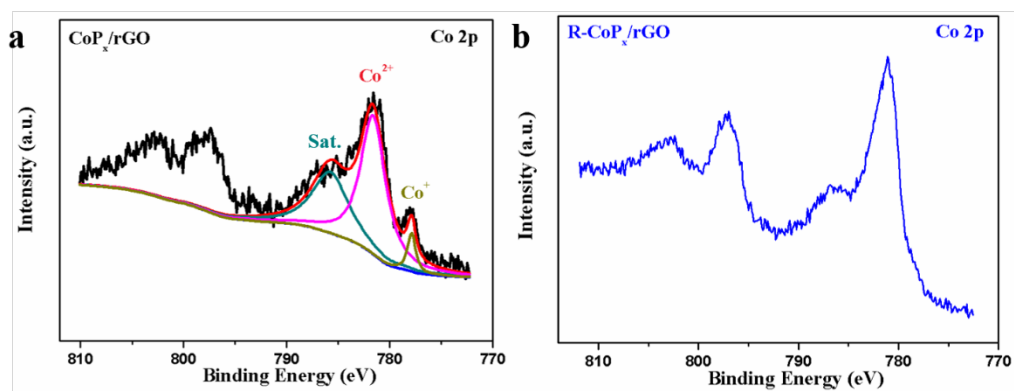

**Fig. S8** The XPS Co 2p spectra of (a)  $\text{CoP}_x/\text{rGO}$  and (b)  $\text{R-CoP}_x/\text{rGO}$ .

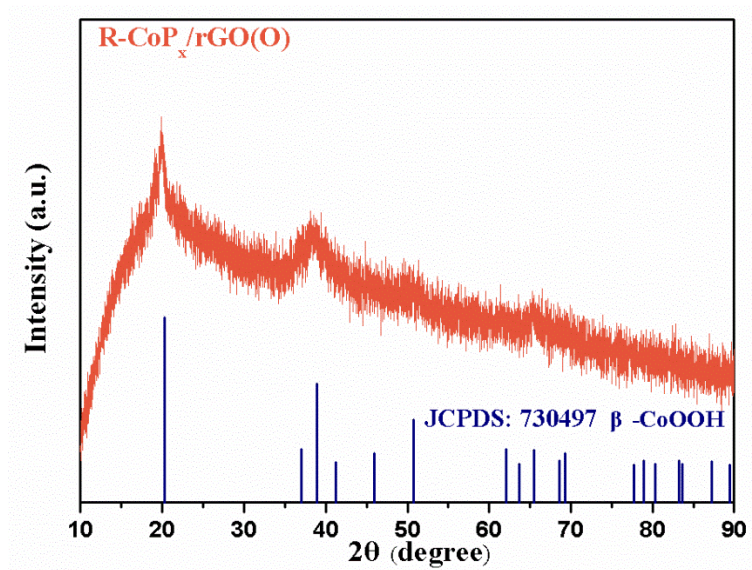

**Fig. S9** XRD pattern of R-CoP<sub>x</sub>/rGO(O).

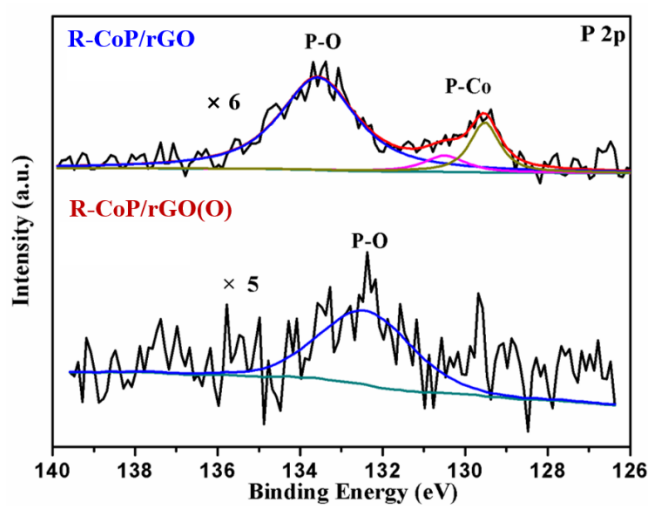

**Fig. S10** XPS P2p spectra of R-CoP<sub>x</sub>/rGO and R-CoP<sub>x</sub>/rGO(O).

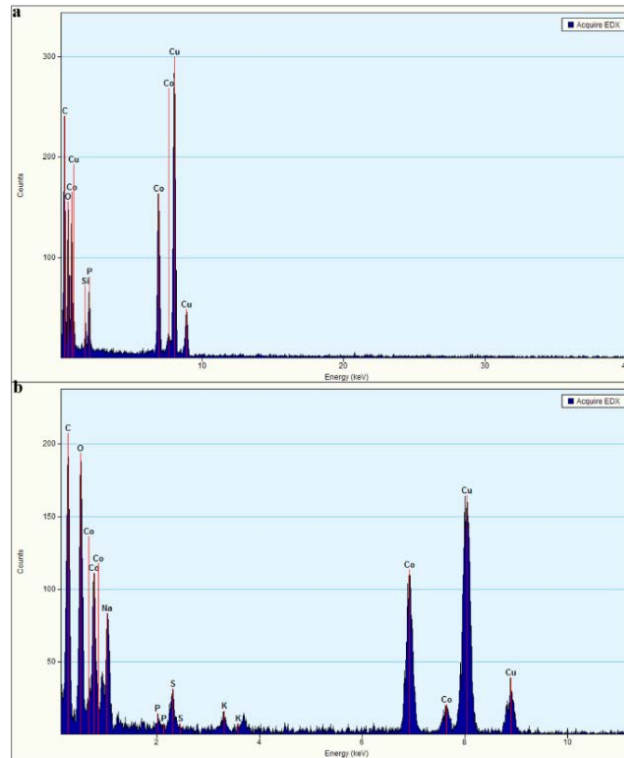

**Fig. S11** (a) EDX (Energy Dispersive X-ray) measurements of R-CoP<sub>x</sub>/rGO. (b) EDX measurements of R-CoP<sub>x</sub>/rGO(O).

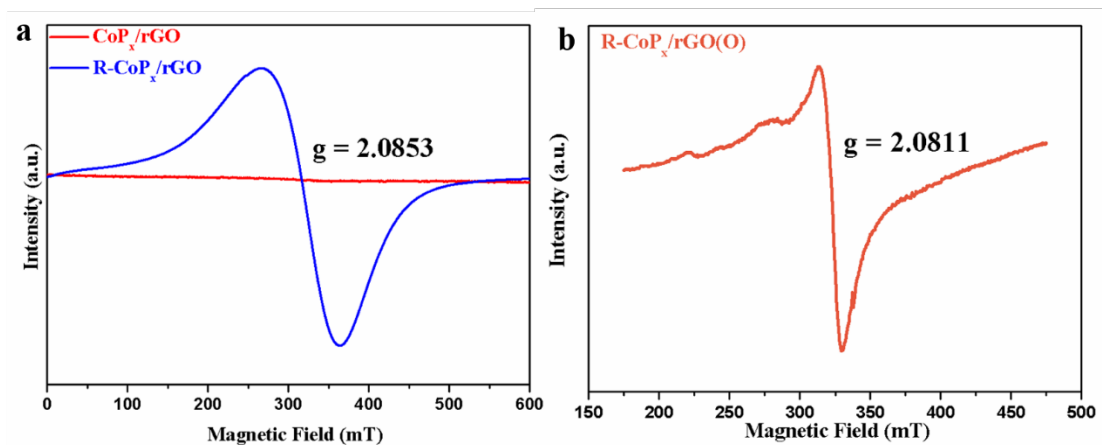

**Fig. S12** Electron Paramagnetic Resonance (EPR) curves of CoP<sub>x</sub>/rGO, R-CoP<sub>x</sub>/rGO and R-CoP<sub>x</sub>/rGO(O).



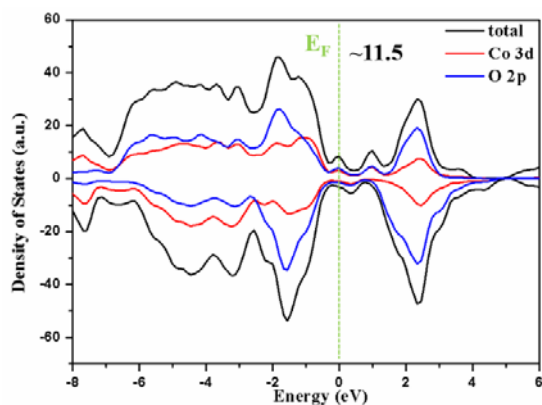

**Fig. S13** DFT results. The thin shell of (101) facet exposed  $\beta$ -CoOOH.

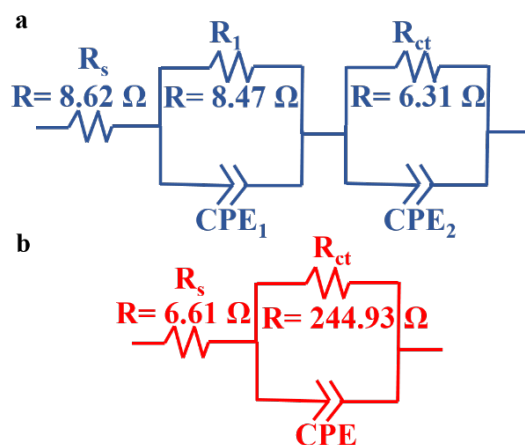

**Fig. S14** Equivalent circuit diagrams of (a) R-CoP<sub>x</sub>/rGO(O) and (b) CoP<sub>x</sub>/rGO(O), respectively.

For R-CoP<sub>x</sub>/rGO(O), as two independent semicircles are obtained in the Nyquist plot, two parallel components (including a polarization resistance ( $R_1$  at high frequencies and  $R_{ct}$  at low frequencies) and a constant phase element (CPE)) are fitted in series with a resistance ( $R_s$ ) from the solution and all ohmic contact. The first semicircle at high frequencies is related to the property of the electrode's surface; whereas another at low frequencies is attributed to the kinetics of the OER process. Only one semicircle is observed in the Nyquist plot of CoP<sub>x</sub>/rGO(O), so only one component (including a polarization resistance ( $R_{ct}$ ) and a constant phase element (CPE)) are fitted in series with a resistance ( $R_s$ ) from the solution and all ohmic contact.



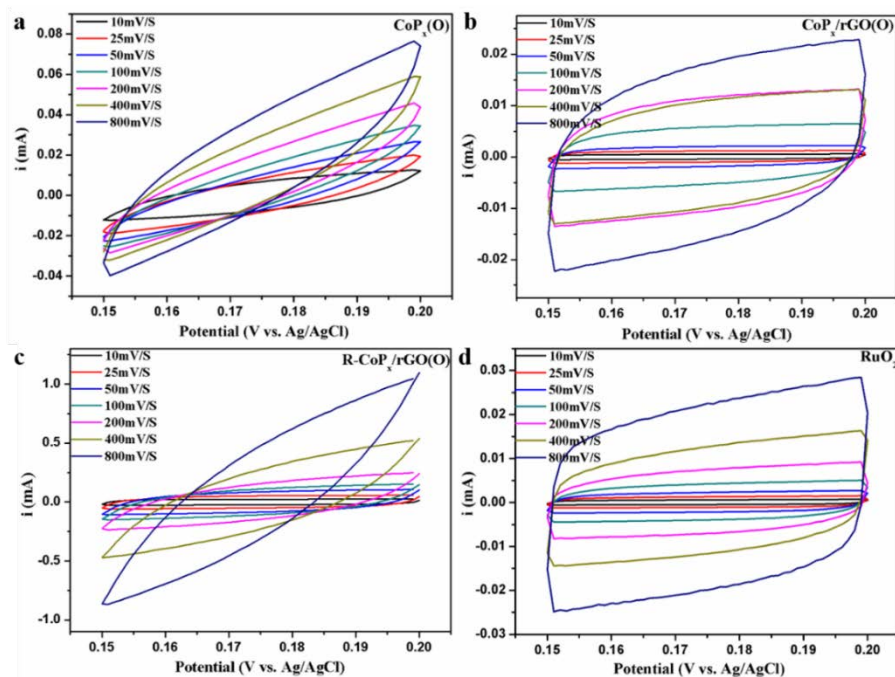

**Fig. S15** CVs of  $\text{CoP}_x(\text{O})$  (a),  $\text{CoP}_x/\text{rGO}(\text{O})$  (b),  $\text{R-CoP}_x/\text{rGO}(\text{O})$  (c) and  $\text{RuO}_2$  (d) samples from 0.15 to 0.20 V vs. Ag/AgCl at various scan rates from 10 mV/s to 800 mV/s in 1.0 M KOH solution.

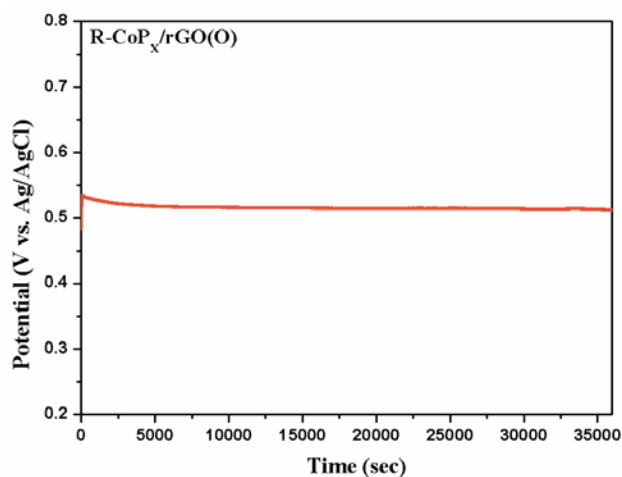

**Fig. S16.** Bulk electrolysis obtained by using  $\text{R-CoP}_x/\text{rGO}(\text{O})$  as the catalyst for water oxidation in 1.0 M KOH under a fix current density of  $10 \text{ mA cm}^{-2}$ .

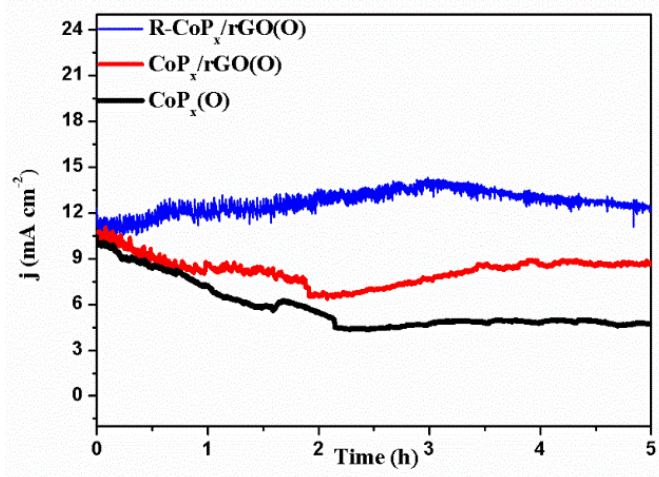

**Fig. S17** Bulk electrolysis obtained by using R-CoP<sub>x</sub>/rGO(O), CoP<sub>x</sub>/rGO(O) and CoP<sub>x</sub>(O) as the catalyst for water oxidation in 1.0 M KOH under overpotentials of 268 mV, 389 mV and 373 mV, respectively.

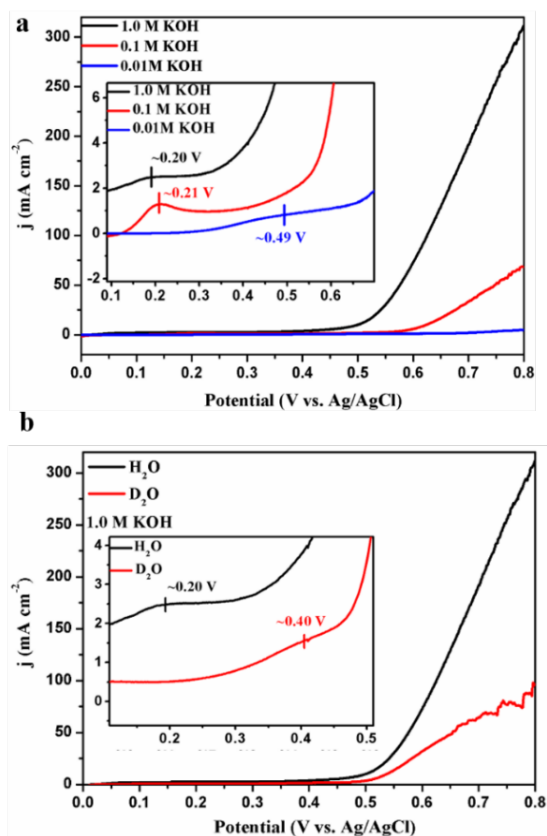

**Fig. S18** (a) Linear sweep voltammograms (LSV) of R-CoP<sub>x</sub>/rGO(O) in 1.0 M, 0.1 M and 0.01 M KOH solutions. (b) Linear sweep voltammograms (LSV) of R-CoP<sub>x</sub>/rGO(O) in 1.0 M H<sub>2</sub>O and D<sub>2</sub>O solutions. The insets of (a) and (b) shows the corresponding magnifying LSV curves and the corresponding Co<sup>2+/3+</sup> anodic peaks.

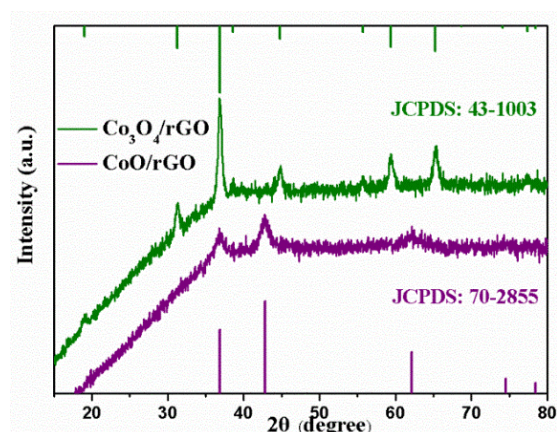

**Fig. S19** PXRD patterns of  $\text{Co}_3\text{O}_4/\text{rGO}$  and  $\text{CoO}/\text{rGO}$ . The vertical lines are the standard diffraction peaks of  $\text{Co}_3\text{O}_4/\text{rGO}$  (JCPDS: 431003) and  $\text{CoO}/\text{rGO}$  (JCPDS: 702855).

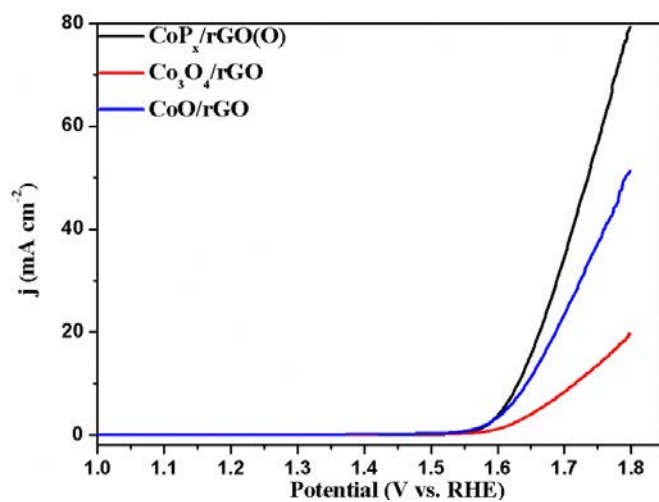

**Fig. S20** Linear sweep voltammograms (LSV) of  $\text{CoP}_x/\text{rGO}(\text{O})$ ,  $\text{Co}_3\text{O}_4/\text{rGO}$  and  $\text{CoO}/\text{rGO}$  samples.

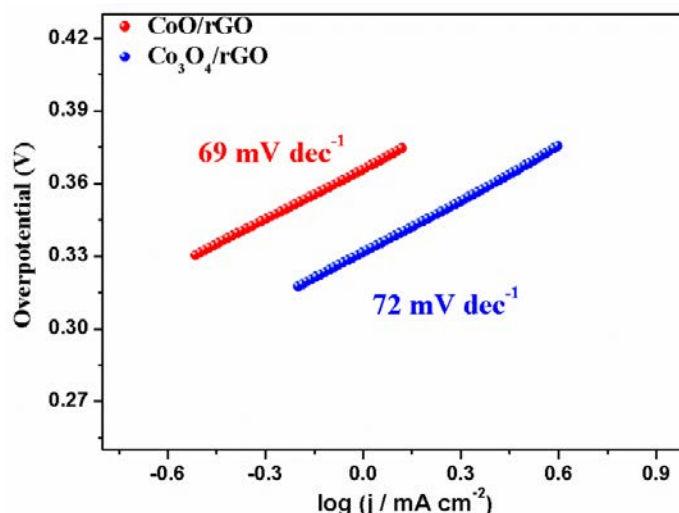

**Fig. S21** Tafel slopes of  $\text{Co}_3\text{O}_4/\text{rGO}$  and  $\text{CoO}/\text{rGO}$  samples.

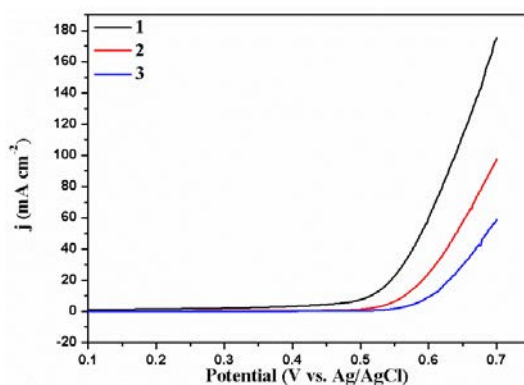

**Fig. S22** The LSV curves of 1  $\text{R-CoP}_x/\text{rGO}(\text{O})$ , 2  $\text{R-CoP}_x/\text{rGO-H}_2\text{O}_2$  and 3  $\text{R-CoP}_x/\text{rGO}(\text{O})\text{-H}_2\text{O}_2$ .

We conducted electrocatalytic experiments to confirm the formation and the effect of defects in the catalysts.

The catalyst  $\text{R-CoP}_x/\text{rGO}(\text{O})$  is represented as 1. The obtained  $\text{R-CoP}_x/\text{rGO}$  powder was dispersed in 30%  $\text{H}_2\text{O}_2$  solution and stirring for 20 min to fill in the defects of  $\text{R-CoP}_x/\text{rGO}$  through oxidation<sup>1</sup>, and then the powder was collected by centrifugation, washed with deionized water for several times and dried in a vacuum oven. Finally, the sample 2 ( $\text{R-CoP}_x/\text{rGO-H}_2\text{O}_2$ ) was obtained. The sample 3 was obtained as the following method. Catalyst  $\text{R-CoP}_x/\text{rGO}$  ink was dropwise added on a glassy carbon electrode and fixed by Nafion (0.5%), then dried in air. And then the  $\text{R-CoP}_x/\text{rGO}(\text{O})$  coated glassy carbon electrode was obtained after electrochemical OER process. Afterwards, this glassy carbon electrode

with R-CoP<sub>x</sub>/rGO(O) was immersed in 30% H<sub>2</sub>O<sub>2</sub> for 20 min to fill in the defects of R-CoP<sub>x</sub>/rGO through oxidation, and the obtained electrode is sample 3.

All electrochemical experiments were conducted using CHI760D Instrument Potentiostat at room temperature (~25°C). The typical three-electrode cell system was employed, including Ag/AgCl electrode as the reference electrode, Pt wire as the counter electrode, and glassy carbon electrode as the working electrode. The water oxidation performance of 1 is superior to 2 and 3 obviously. The relatively poorer oxygen evolution activity of 2 and 3 probably is caused by the defects in sample 2 and 3 which have been filled with oxygen. In sum, the results reveal that the formation phosphorus vacancies in the main catalysts.<sup>1</sup>

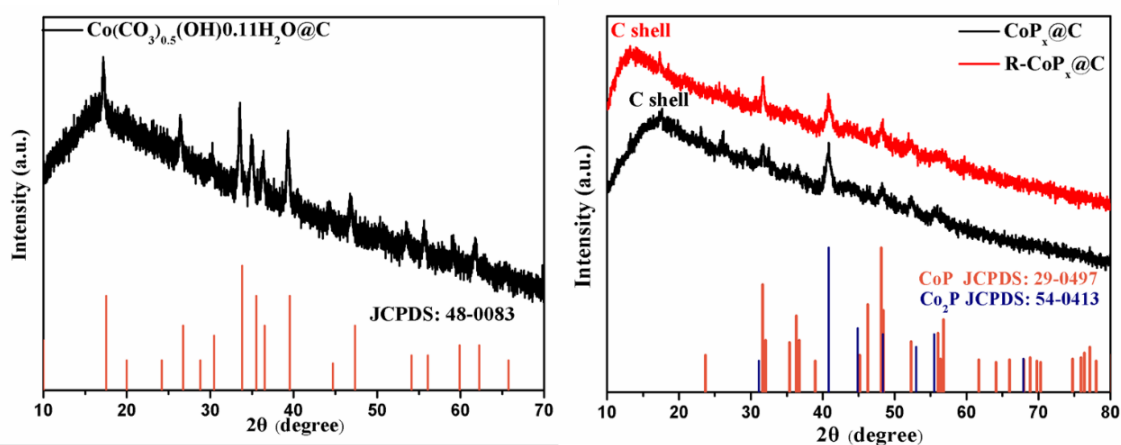

**Fig. S23** (a) PXRD patterns of Co(CO<sub>3</sub>)<sub>0.5</sub>(OH)0.11H<sub>2</sub>O@C. The vertical lines are the standard diffraction peaks of Co(CO<sub>3</sub>)<sub>0.5</sub>(OH)0.11H<sub>2</sub>O (JCPDS: 480083). (b) PXRD patterns of CoP<sub>x</sub>@C and R-CoP<sub>x</sub>@C. The vertical lines are the standard diffraction peaks of CoP (JCPDS: 290497) and Co<sub>2</sub>P (JCPDS: 540413).

When the defects in R-CoP<sub>x</sub>/rGO and R-CoP<sub>x</sub>/rGO(O) are filled with oxygen, the OER performances of the R-CoP<sub>x</sub>/rGO and R-CoP<sub>x</sub>/rGO(O) are significantly reduced (Fig. S22), revealing the positive effect of the defects on the improvement of the catalysts' water oxidation properties.

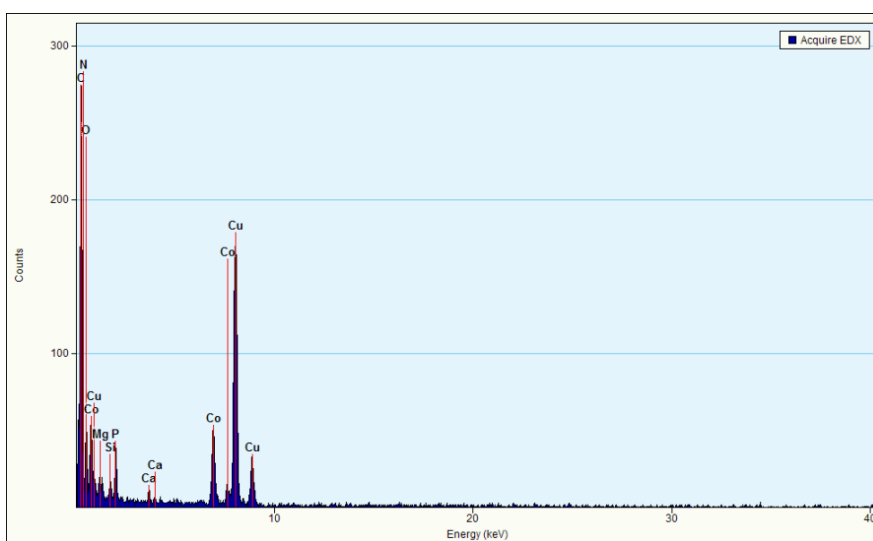

**Fig. S24** Energy Dispersive X-ray measurements of R-CoP<sub>x</sub>@C.

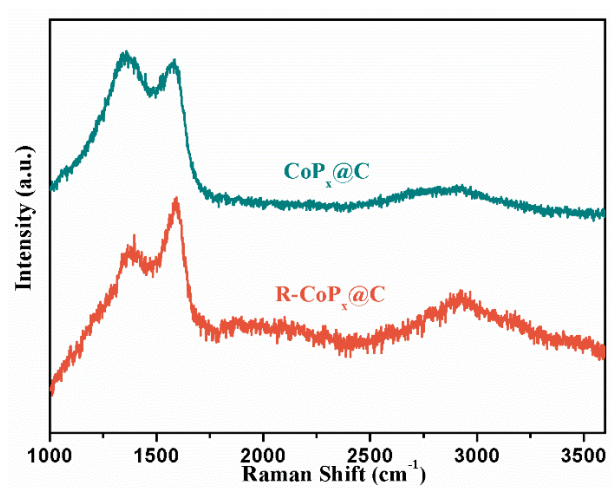

**Fig. S25** Raman spectroscopy spectra of CoP<sub>x</sub>@C and R-CoP<sub>x</sub>@C.

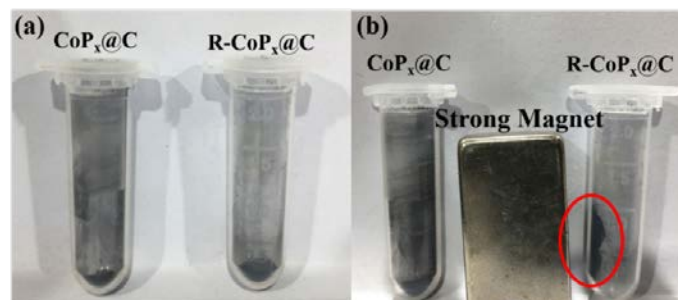

**Fig. S26** (a) The photo images of CoP<sub>x</sub>@C and R-CoP<sub>x</sub>@C. (b) The photo images of CoP<sub>x</sub>@C and R-CoP<sub>x</sub>@C in the magnetic field.

**Table S1.** Summary of the electrochemical water oxidation activities of Co-based metal phosphides.

| Catalyst                   | Electrolyte | $\eta$ at 10mAcm <sup>-2</sup> (mv) | Ref.      |
|----------------------------|-------------|-------------------------------------|-----------|
| R-CoP <sub>x</sub> /rGO(O) | 1M KOH      | 268                                 | This work |
| CoP <sub>x</sub> /rGO(O)   | 1M KOH      | 389                                 | This work |
| CoP <sub>x</sub> (O)       | 1M KOH      | 373                                 | This work |
| RuO <sub>2</sub>           | 1M KOH      | 287                                 | This work |
| CoP <sub>3</sub> NAs/CFP   | 1M KOH      | 334                                 | 2         |
| Co/CoP-5                   | 1M KOH      | 340                                 | 3         |
| CoP-based nano<br>Needle   | 1M KOH      | 281                                 | 4         |
| CoP <sub>2</sub> /RGO      | 1M KOH      | 300                                 | 5         |
| CoP hollow polyhedron      | 1M KOH      | 400                                 | 6         |
| CoMnP                      | 1M KOH      | 330                                 | 7         |

### Reference

1. Z. Beibei, W. Lei, Z. Yajun, D. Yong and B. Yingpu, *Angew. Chem. Int. Ed.*, 2018, 57, 2248-2252.
2. T. Wu, M. Pi, D. Zhang and S. Chen, *J. Mater. Chem. A*, 2016, 4, 14539-14544.
3. Z.-H. Xue, H. Su, Q.-Y. Yu, B. Zhang, H.-H. Wang, X.-H. Li and J.-S. Chen, *Adv. Energy Mater.*, 2017, 7, 1602355-n/a.
4. P. Wang, F. Song, R. Amal, Y. H. Ng and X. Hu, *ChemSusChem*, 2016, 9, 472-477.
5. J. Wang, W. Yang and J. Liu, *J. Mater. Chem. A*, 2016, 4, 4686-4690.
6. M. Liu and J. Li, *ACS Appl. Mater. Interfaces*, 2016, 8, 2158-2165.
7. D. Li, H. Baydoun, C. N. Verani and S. L. Brock, *J. Am. Chem. Soc.*, 2016, 138, 4006-4009.
